# Supplementary material
Source: HighWire-hosted journal article supplement (https://rmdopen.bmj.com/content/8/2/e002673)
Supplement: inline-supplementary-material-1 [file inline-supplementary-material-1.pdf]

## SUPPLEMENTARY MATERIALS

**Title:** Latent trajectory modeling of pulmonary artery pressure in systemic sclerosis: A retrospective cohort study

**Supplemental Table 1.** Results of the selection indicators for each model generated by group-based trajectory modeling

| Number and shape |           | Judgement  | Minimum APPA | Minimum OCC | Relative entropy | Size of minimum group (%) | BIC     |
|------------------|-----------|------------|--------------|-------------|------------------|---------------------------|---------|
| 2 groups         | Linear    | Candidate  | 0.926        | 8.682       | 0.8              | 30.08                     | 3786.18 |
| 2 groups         | Quadratic | Candidate  | 0.925        | 9.019       | 0.801            | 30.51                     | 3789.45 |
| 2 groups         | Cubic     | Candidate  | 0.924        | 8.937       | 0.8              | 30.51                     | 3793.34 |
| 3 groups         | Linear    | Candidate  | 0.842        | 9.382       | 0.754            | 13.56                     | 3727.98 |
| 3 groups         | Quadratic | Violation  | 0.822        | 3.769       | 0.649            | 15.25                     | 3772.38 |
| 3 groups         | Cubic     | Violation  | 0.807        | 4.093       | 0.689            | 16.53                     | 3771.55 |
| 4 groups         | Linear    | Violation  | 0.739        | 4.167       | 0.635            | 13.56                     | 3721.39 |
| 4 groups         | Quadratic | Candidate  | 0.804        | 5.522       | 0.709            | 8.05                      | 3723.22 |
| 4 groups         | Cubic     | Candidate  | 0.815        | 6.04        | 0.705            | 10.59                     | 3722.35 |
| 5 groups         | Linear    | Violation  | 0.79         | 5.533       | 0.7              | 2.97                      | 3714.03 |
| 5 groups         | Quadratic | Identified | 0.739        | 5.318       | 0.709            | 3.81                      | 3723.34 |
| 5 groups         | Cubic     | Violation  | 0.664        | 5.16        | 0.649            | 4.24                      | 3712.2  |
| 6 groups         | Linear    | Violation  | 0.811        | 5.95        | 0.743            | 1.27                      | 3710.14 |
| 6 groups         | Quadratic | Violation  | 0.77         | 7.041       | 0.732            | 2.97                      | 3695.88 |
| 6 groups         | Cubic     | Violation  | 0.554        | 4.67        | 0.581            | 5.08                      | 3715.48 |
| 7 groups         | Linear    | Violation  | 0.549        | 3.071       | 0.55             | 3.39                      | 3719.41 |
| 7 groups         | Quadratic | Violation  | 0.703        | 4.441       | 0.633            | 1.69                      | 3682.04 |
| 7 groups         | Cubic     | Violation  | 0.575        | 5.516       | 0.655            | 2.97                      | 3708.02 |

The appropriate model was determined on the basis of the following adequacy criteria: (a) the APPA for each trajectory should be  $> 0.7$ , (b) the OCC for each trajectory should be  $> 5$ , (c) the relative entropy should be  $> 0.5$ , and (d) the minimum number of individuals assigned to each trajectory should exceed 3% of the total population. Of the models that met all of the above criteria, one model was identified based on the BIC and clinical interpretability for the number and shape of the trajectories.

APPA, average posterior probability of assignments; OCC, odds of correct classification; BIC, Bayesian information criterion.

**Supplemental Table 2.** Clinical findings regarding PH in 36 patients diagnosed with PH

|                                                                    | PAP trajectories        |                        |                        |                      |                     |
|--------------------------------------------------------------------|-------------------------|------------------------|------------------------|----------------------|---------------------|
|                                                                    | Rapid progression (n=8) | Early elevation (n=12) | Middle elevation (n=9) | Late elevation (n=5) | Low stable (n=2)    |
| <b>Clinical classification*, n (%)</b>                             |                         |                        |                        |                      |                     |
| -Group 1 (isolated)                                                | 3 (38)                  | 7 (58.3)               | 5 (56)                 | 3 (60)               | 1 (50)              |
| -Group 2 (isolated)                                                | 2 (25)                  | 1 (8.3)                | 1 (11)                 | 0 (0)                | 1 (50)              |
| -Group 3 (isolated)                                                | 0 (0)                   | 1 (8.3)                | 1 (11)                 | 0 (0)                | 0 (0)               |
| -Group 1+2 (combined)                                              | 2 (25)                  | 1 (8.3)                | 0 (0)                  | 0 (0)                | 0 (0)               |
| -Group 1+3 (combined)                                              | 1 (13)                  | 1 (8.3)                | 2 (22)                 | 2 (40)               | 0 (0)               |
| -Group 1+4 (combined)                                              | 0 (0)                   | 1 (8.3)                | 0 (0)                  | 0 (0)                | 0 (0)               |
| <b>Hemodynamic parameters, median [IQR], (number of patients†)</b> |                         |                        |                        |                      |                     |
| -mean RAP (mmHg)                                                   | 7 [6–8] (n=7)           | 6 [4–7] (n=9)          | 7 [7–9] (n=5)          | 3 [2–4] (n=4)        | 10 [7–13] (n=2)     |
| -systolic PAP (mmHg)                                               | 42 [36–53] (n=8)        | 39 [36–42] (n=10)      | 32 [30–38] (n=6)       | 38 [35–38] (n=5)     | 40 [39–40] (n=2)    |
| -diastolic PAP (mmHg)                                              | 18 [14–28] (n=8)        | 17 [15–18] (n=10)      | 14 [13–16] (n=6)       | 16 [16–18] (n=5)     | 16 [15–18] (n=2)    |
| -mean PAP (mmHg)                                                   | 27 [24–39] (n=8)        | 24 [22–28] (n=12)      | 22 [21–23] (n=9)       | 25 [22–26] (n=5)     | 26 [24–27] (n=2)    |
| -PAWP (mmHg)                                                       | 10 [8–11] (n=8)         | 10 [6–13] (n=12)       | 11 [10–12] (n=9)       | 10 [9–10] (n=5)      | 15 [11–18] (n=2)    |
| -CO (L/min)                                                        | 2.8 [2.5–4.2] (n=8)     | 3.9 [3.6–4.2] (n=9)    | 3.8 [3.7–4.1] (n=6)    | 4.4 [3.6–5.7] (n=5)  | 4.2 [4.0–4.4] (n=2) |
| -PVR (WU)                                                          | 4.4 [3.1–13.0] (n=8)    | 3.9 [3.8–4.7] (n=9)    | 2.6 [2.0–3.6] (n=6)    | 2.7 [2.5–4.5] (n=5)  | 2.9 [2.8–2.9] (n=2) |

\* With reference to the clinical classification of the 6th World Symposium on Pulmonary Hypertension. Group 1, pulmonary arterial hypertension; group 2, PH associated with left heart disease; group 3, PH associated with lung diseases and/or hypoxia. All patients classified in Group 1 (both isolated and combined) met the definition of pre-capillary PH in this study (mPAP >20 mmHg and PAWP ≤15 mmHg).

† Indicating the number of patients for whom data were available.

PH, pulmonary hypertension; PAP, pulmonary arterial pressure; IQR, interquartile range; RAP, right atrial pressure; PAWP, pulmonary arterial wedge pressure; CO, cardiac output; PVR, pulmonary vascular resistance; WU, Wood Units.

## Supplemental Figure 1.

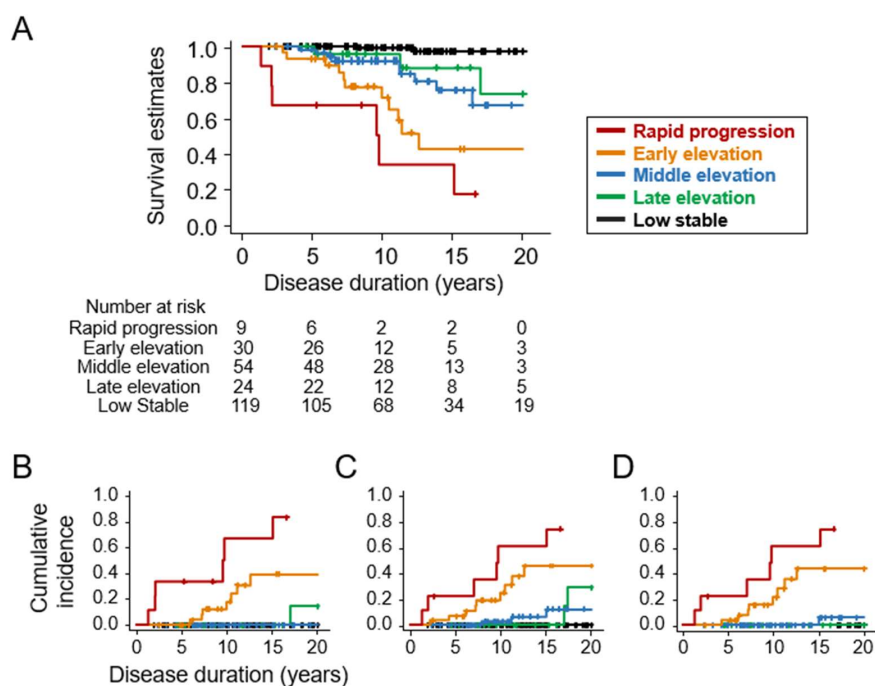

**Supplemental Figure 1.** Sensitivity analysis of pulmonary artery pressure trajectories and clinical outcomes in patients with systemic sclerosis. PH was redefined with  $mPAP \geq 25$  mmHg instead of  $mPAP > 20$  mmHg, and pre-capillary PH was redefined with  $PVR > 2$  or  $> 3$  WU in addition to  $mPAP > 20$  mmHg and  $PAWP \leq 15$  mmHg. **A**, Kaplan–Meier survival estimates for PH-free survival in each trajectory. **B–D**, Cumulative incidence functions of PH (**B**), pre-capillary PH with  $PVR > 2$  WU (**C**), and pre-capillary PH with  $PVR > 3$  WU (**D**) in each trajectory. PH, pulmonary hypertension;  $mPAP$ , mean systolic pulmonary arterial pressure;  $PVR$ , pulmonary vascular resistance; WU, Wood Units;  $PAWP$ , pulmonary arterial wedge pressure.

**Supplemental Table 3.** Clinical factors associated with a shift in membership towards trajectories with earlier sPAP elevation\*

| Clinical factors         | OR          | 95% CI           |
|--------------------------|-------------|------------------|
| Age of onset (years)     | <b>1.05</b> | <b>1.02–1.07</b> |
| Female                   | 1.60        | 0.70–3.77        |
| Ever smoking             | 1.59        | 0.83–3.02        |
| Hypertension             | 1.52        | 0.89–2.60        |
| Type of autoantibody     |             |                  |
| -Anti-centromere         | 1.08        | 0.50–2.42        |
| -Anti-topoisomerase I    | 0.77        | 0.30–1.94        |
| -Anti-RNA polymerase III | 1.66        | 0.45–5.95        |
| Diffuse cutaneous SSc    | <b>2.47</b> | <b>1.19–5.16</b> |
| Lung fibrosis            | 1.77        | 0.96–3.28        |
| Cardiac involvement      | <b>4.02</b> | <b>1.51–11.0</b> |
| Digital ulcers           | 1.58        | 0.89–2.82        |

The proportional odds ratios and 95% confidence intervals adjusted for all 11 variables in the ordinal logistic regression model are shown. Results are highlighted in bold when the 95% confidence interval did not exceed 1.0 (the null value).

\* Rapid progression, early elevation, middle elevation, late elevation, and low stable, in that order.

sPAP, systolic pulmonary arterial pressure; OR, odds ratio; 95% CI, 95% confidence interval; SSc, systemic sclerosis.

**Supplemental Table 4.** Clinical characteristics of patients excluded due to the lack of testing

|                                                  | Eligible<br>(n=236) | Lack of testing<br>(n=89) |
|--------------------------------------------------|---------------------|---------------------------|
| <b>Baseline clinical factors</b>                 |                     |                           |
| Age of onset (years)                             | 61 [49–69]          | 61 [55–66]                |
| Female                                           | 204 (86)            | 86 (97)                   |
| Ever smoking                                     | 65 (28)             | 24 (27)                   |
| Hypertension                                     | 81 (34)             | 21 (24)                   |
| Type of autoantibody                             |                     |                           |
| -Anti-centromere                                 | 142 (60)            | 77 (87)                   |
| -Anti-topoisomerase I                            | 47 (20)             | 7 (7.9)                   |
| -Anti-RNA polymerase III                         | 13 (5.5)            | 0 (0)                     |
| Diffuse cutaneous SSc                            | 58 (25)             | 6 (6.7)                   |
| Lung fibrosis                                    | 82 (35)             | 12 (14)                   |
| Cardiac involvement                              | 18 (7.6)            | 1 (1.1)                   |
| Digital ulcers                                   | 70 (30)             | 5 (5.6)                   |
| <b>Clinical outcomes</b>                         |                     |                           |
| Observation period (years)                       | 10.7 [6.6–15.6]     | 7.6 [5.6–12.5]            |
| PH                                               | 36 (15)             | 0 (0)                     |
| Hospitalization for heart failure from any cause | 30 (13)             | 2 (2.2)                   |
| Death from any cause                             | 23 (9.7)            | 1 (1.1)                   |

Age of onset and observation period is described as median [interquartile range], and other categorical variables are described as number (%).
